# Supplementary material
Source: publisher site journal article supplement (https://www.dovepress.com/article/348866)

**Supplementary Material**

Additional Figure Legends

Figure S1. Ginsenoside Rb1 reduced lipid accumulation in the liver and promoted liver function. (A) representative images of Oil red O staining and (B) quantitative analysis of Oil red O stainings and (C) representative images of HE staining in five groups. Scale bar, 50 μm. Serum (D) ALT and (E) AST levels in different groups. Data are expressed as the mean ± SEM (n = 3-6). ***p<0.001 or **p<0.01 or *p<0.05 vs. model group; ###p<0.001 or ##p<0.01 or #p<0.05 vs. the control.

Figure S2. Ginsenoside Rb1 reduced lipid accumulation and promoted glucose and lipid metabolism in PA-treated H9c2 cells. MTT assay showing H9c2 cell viability by (A) different concentrations of PA; (B) different concentrations of ginsenoside Rb1 and (C) pretreatment with different concentrations of ginsenoside Rb1 before adding PA. (D) Representative images of BODIPY staining (E) and quantitative analysis of green fluorescence in H9c2 cells. Scale bar, 100 μm. (F) Representative blot images of proteins related to lipid and glucose metabolism and (G) quantitative analysis of protein levels. Data are expressed as the mean ± SEM (n = 3-6). *p<0.05 or **p<0.01 or ***p<0.001vs. model group; ###p<0.001 or ##p<0.01vs. the control. H-Rb1, 20μM ginsenoside Rb1, M-Rb1, 40μM ginsenoside Rb1, L-Rb1, 80μM ginsenoside Rb1.

Figure S3. Ginsenoside Rb1 treatment reduced oxidative stress in diabetic heart. (A) CAT; (B) GSH; (C) MDA and (D) SOD levels in sera of mice from six groups. (E) Representative images of mitochondrial ROS in H9c2 cells visualized using MitoSOX and (F) quantitative analysis of mitochondrial ROS in six groups. Scale bar, 100 μm. (G) Transcription levels of genes related to oxidative stress response and ROS metabolism in indicated groups. Data are expressed as the mean ± SEM (n = 3-6). ***p<0.001 or **p<0.01 or *p<0.05 vs. model group; ###p<0.001 vs. the control. H-Rb1, 20μM ginsenoside Rb1, M-Rb1, 40μM ginsenoside Rb1, L-Rb1, 80μM ginsenoside Rb1.

Figure S1


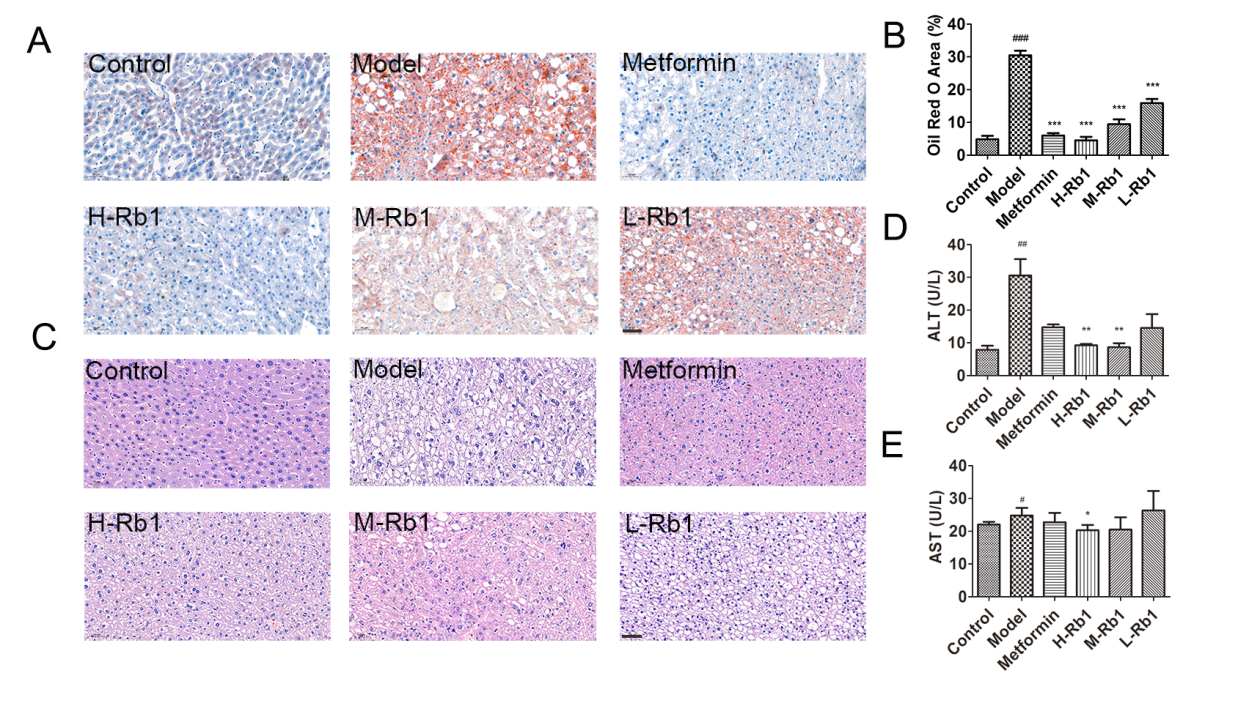


Figure S2


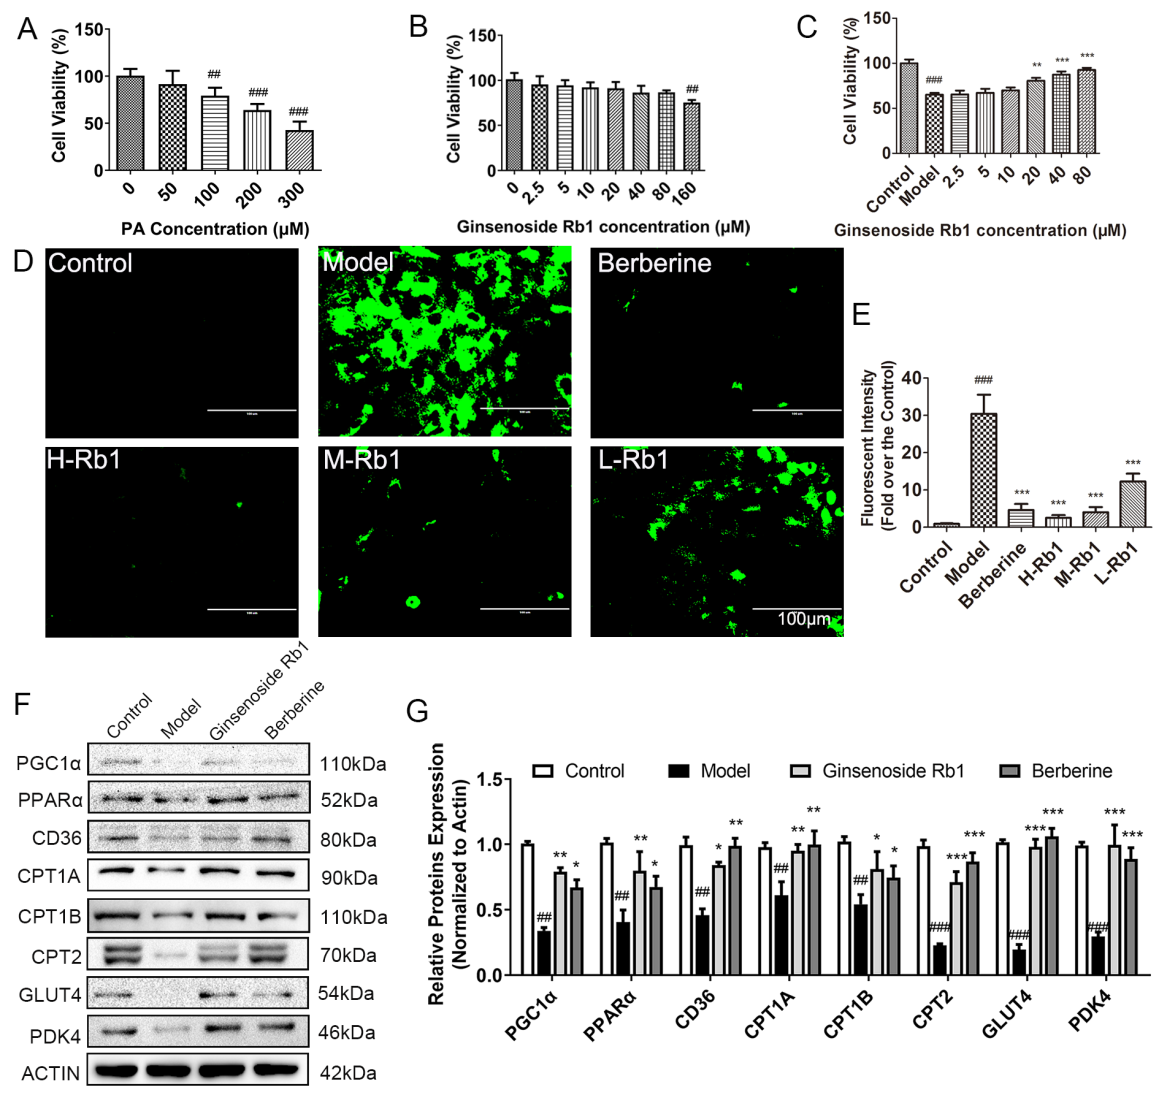


Figure S3


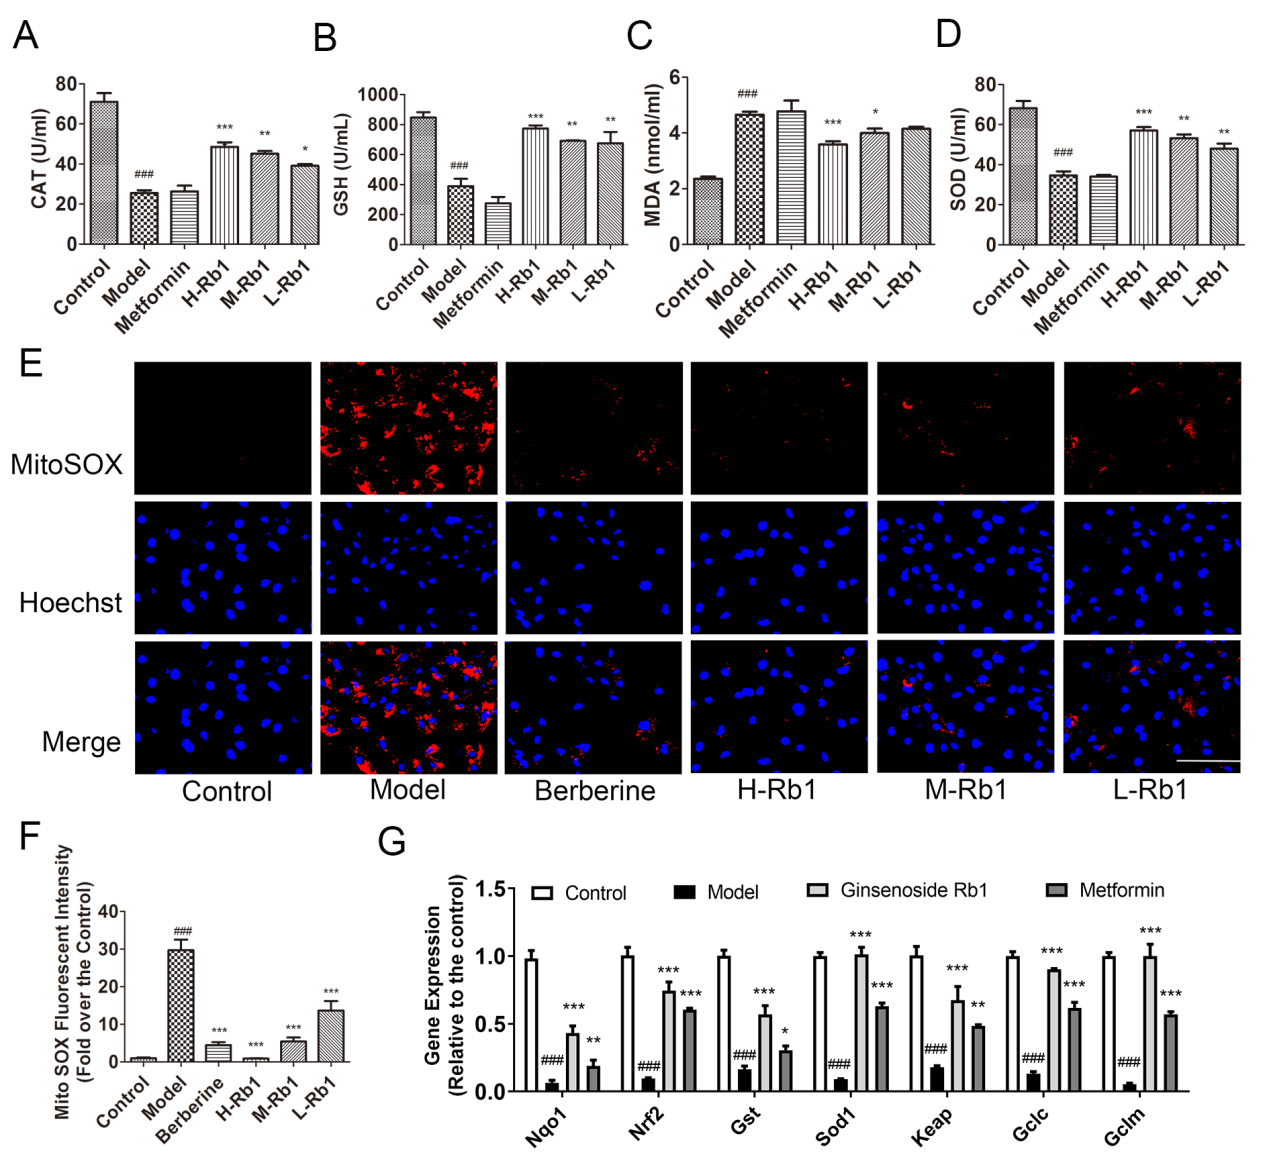

Supplement: Supplementary file 1 [file get_supplementary_file.php]
